# Supplementary material
Source: PubMed Central journal article supplement (PMC1326399)
Supplement: 4-embor941-s1.pdf [file 4-embor941-s1.pdf]

Table I: post-translational modifications of HATs

| Enzyme | Modif <sup>1</sup> | Modifying enzyme  | Molecular role of the modification     | Signalling pathway                 | References                                                                  |
|--------|--------------------|-------------------|----------------------------------------|------------------------------------|-----------------------------------------------------------------------------|
| CBP    | Phospho            | Cyclin E/cdk2     | Stimulation of HAT activity            | Progression towards S phase        | (Ait-Si-Ali et al., 1998)                                                   |
| CBP    | Phospho            | Non classical PKC | Recruitment to transcription factors   | Growth factors                     | (Zanger et al., 2001)                                                       |
| CBP    | Phospho            | CaMKIV            | Transcriptional activation             | Neuronal activity                  | (Impey et al., 2002)                                                        |
| CBP    | Phospho            | Map kinases       | Stimulation of HAT activity            | neuronal differentiation           | (Ait-Si-Ali et al., 1999 ; Janknecht and Nordheim, 1996 ; Liu et al., 1999) |
| CBP    | Met                | CARM1             | Inhibition of CREB binding             | Various pathways                   | (Xu et al., 2001)                                                           |
|        |                    |                   | Transcriptional activation             | Estrogen response                  | (Chevallard-Briet et al., 2002)                                             |
| p300   | Phospho            | AMP kinase        | Inhibition of nuclear receptor binding | ?                                  | (Yang et al., 2001)                                                         |
| p300   | Phospho            | PKC $\delta$      | Inhibition of HAT activity             | Growth Suppression?                | (Yuan and Gambia, 2000; Yuan et al., 2002)                                  |
| p300   | Phospho            | ?                 | Transcriptional activation             | Various pathways                   | (Schwartz et al., 2003)                                                     |
| p300   | Sumo-1             | Ubc9              | Transcriptional repression             | ?                                  | (Girdwood et al., 2003)                                                     |
| P/CAF  | Ac                 | P/CAF             | Stabilization of the enzyme ?          | ?                                  | (Herrera et al., 1997)                                                      |
| GCN5   | phospho            | DNA-PK            | Decreased HAT activity                 | Response to double-strand breaks ? | (Barlev et al., 1998)                                                       |
| ACTR   | Ac                 | p300              | Reduced nuclear receptor binding       | Hormone response                   | (Chen et al., 1999)                                                         |
| ATF-2  | phospho            | P38, JNK          | Stimulation of HAT activity            | Response to UV irradiation         | (Kawasaki et al., 2000)                                                     |
| Tip60  | Phospho            | ?                 | Stimulation of HAT activity            | Cell cycle control ?               | (Lemercier et al., 2003)                                                    |
| Tip60  | Ubiq               | Mdm2              | Degradation                            | Response to UV irradiation         | (Legube et al., 2002)                                                       |

<sup>1</sup>Modifications : Phosphorylation (phospho), Acetylation (Ac), Methylation (Met) , Ubiquitylation (Ubiq).

## References

- Ait-Si-Ali, S., Carlisi, D., Ramirez, S., Upegui-Gonzalez, L.C., Duquet, A., Robin, P., Rudkin, B., Harel-Bellan, A. and Trouche, D. (1999) Phosphorylation by p44 MAP Kinase/ERK1 stimulates CBP histone acetyl transferase activity in vitro. *Biochem Biophys Res Commun*, **262**, 157-62.
- Ait-Si-Ali, S., Ramirez, S., Barre, F.X., Dkhissi, F., Magnaghi-Jaulin, L., Girault, J.A., Robin, P., Knibiehler, M., Pritchard, L.L., Ducommun, B., Trouche, D. and Harel-Bellan, A. (1998) Histone acetyltransferase activity of CBP is controlled by cycle-dependent kinases and oncoprotein E1A. *Nature*, **396**, 184-6.
- Barlev, N.A., Poltoratsky, V., Owen-Hughes, T., Ying, C., Liu, L., Workman, J.L. and Berger, S.L. (1998) Repression of GCN5 histone acetyltransferase activity via bromodomain- mediated binding and phosphorylation by the Ku-DNA-dependent protein kinase complex. *Mol Cell Biol*, **18**, 1349-58.
- Chen, H., Lin, R.J., Xie, W., Wilpitz, D. and Evans, R.M. (1999) Regulation of hormone-induced histone hyperacetylation and gene activation via acetylation of an acetylase. *Cell*, **98**, 675-86.
- Chevillard-Briet, M., Trouche, D. and Vandell, L. (2002) Control of CBP co-activating activity by arginine methylation. *Embo J*, **21**, 5457-66.
- Girdwood, D., Bumpass, D., Vaughan, O.A., Thain, A., Anderson, L.A., Snowden, A.W., Garcia-Wilson, E., Perkins, N.D. and Hay, R.T. (2003) p300 Transcriptional Repression Is Mediated by SUMO Modification. *Mol. Cell*, **11**, 1043-1054.
- Herrera, J.E., Bergel, M., Yang, X.J., Nakatani, Y. and Bustin, M. (1997) The histone acetyltransferase activity of human GCN5 and PCAF is stabilized by coenzymes. *J Biol Chem*, **272**, 27253-8.
- Impey, S., Fong, A.L., Wang, Y., Cardinaux, J.R., Fass, D.M., Obrietan, K., Wayman, G.A., Storm, D.R., Soderling, T.R. and Goodman, R.H. (2002) Phosphorylation of CBP mediates transcriptional activation by neural activity and CaM kinase IV. *Neuron*, **34**, 235-44.
- Janknecht, R. and Nordheim, A. (1996) MAP kinase-dependent transcriptional coactivation by Elk-1 and its cofactor CBP. *Biochem. Biophys. Res. Commun.*, **228**, 831-837.
- Kawasaki, H., Schiltz, L., Chiu, R., Itakura, K., Taira, K., Nakatani, Y. and Yokoyama, K.K. (2000) ATF-2 has intrinsic histone acetyltransferase activity which is modulated by phosphorylation. *Nature*, **405**, 195-200.
- Legube, G., Linares, L.K., Lemercier, C., Scheffner, M., Khochbin, S. and Trouche, D. (2002) Tip60 is targeted to proteasome-mediated degradation by Mdm2 and accumulates after UV irradiation. *Embo J*, **21**, 1704-1712.
- Lemercier, C., Legube, G., Caron, C., Louwagie, M., Garin, J., Trouche, D. and Khochbin, S. (2003) Tip60 acetyltransferase activity is controlled by phosphorylation. *J Biol Chem*, **278**, 4713-8.
- Liu, Y.Z., Thomas, N.S. and Latchman, D.S. (1999) CBP associates with the p42/p44 MAPK enzymes and is phosphorylated following NGF treatment. *Neuroreport*, **10**, 1239-43.
- Schwartz, C., Beck, K., Mink, S., Schmolke, M., Budde, B., Wenning, D. and Klempnauer, K.H. (2003) Recruitment of p300 by C/EBPbeta triggers phosphorylation of p300 and modulates coactivator activity. *Embo J*, **22**, 882-92.
- Xu, W., Chen, H., Du, K., Asahara, H., Tini, M., Emerson, B.M., Montminy, M. and Evans, R.M. (2001) A transcriptional switch mediated by cofactor methylation. *Science*, **294**, 2507-11.
- Yang, W., Hong, Y.H., Shen, X.Q., Frankowski, C., Camp, H.S. and Leff, T. (2001) Regulation of transcription by AMP-activated protein kinase: phosphorylation of p300 blocks its interaction with nuclear receptors. *J Biol Chem*, **276**, 38341-4.
- Yuan, L.W. and Gambée, J.E. (2000) Phosphorylation of p300 at serine 89 by protein kinase C. *J Biol Chem*, **275**, 40946-51.
- Yuan, L.W., Soh, J.W. and Weinstein, I.B. (2002) Inhibition of histone acetyltransferase function of p300 by PKCdelta. *Biochim Biophys Acta*, **1592**, 205-11.

Zanger, K., Radovick, S. and Wondisford, F.E. (2001) CREB binding protein recruitment to the transcription complex requires growth factor-dependent phosphorylation of its GF box. *Mol Cell*, 7, 551-8.

Table II: post-translational modifications of HDACs

| Enzyme         | Modif <sup>1</sup> | Modifying enzyme    | Molecular role of the modification                      | Signalling pathway                     | References                                                        |
|----------------|--------------------|---------------------|---------------------------------------------------------|----------------------------------------|-------------------------------------------------------------------|
| Class II HDACs | Phospho            | CaMkinases<br>other | Nuclear export –<br>Interaction with<br>14-3-3 proteins | Induction of muscle<br>differentiation | See (McKinsey et al.,<br>2001) and references<br>therein          |
| HDAC1/2        | Phospho            | CK2                 | Stimulation of<br>HDAC activity                         | Cell cycle and<br>apoptosis            | (Pflum et al., 2001; Sun et<br>al., 2002; Tsai and Seto,<br>2002) |
| HDAC1          | Sumo-1             | ?                   | Increased<br>transcriptional<br>repression ?            | ?                                      | (Colombo et al., 2002;<br>David et al., 2002 )                    |
| HDAC4          | Sumo-1             | RanBP2              | Stimulation of<br>HDAC activity                         | Control of muscle<br>differentiation   | (Kirsh et al., 2002)                                              |

<sup>1</sup>Modifications : Phosphorylation (phospho), Sumoylation by Sumo-1 (Sumo-1)

## References

- Colombo, R., Boggio, R., Seiser, C., Draetta, G.F. and Chiocca, S. (2002) The adenovirus protein Gam1 interferes with sumoylation of histone deacetylase 1. *EMBO Rep*, 3, 1062-8.
- David, G., Neptune, M.A. and DePinho, R.A. (2002) SUMO-1 modification of histone deacetylase 1 (HDAC1) modulates its biological activities. *J Biol Chem*, 277, 23658-63.
- Kirsh, O., Seeler, J.S., Pichler, A., Gast, A., Muller, S., Miska, E., Mathieu, M., Harel-Bellan, A., Kouzarides, T., Melchior, F. and Dejean, A. (2002) The SUMO E3 ligase RanBP2 promotes modification of the HDAC4 deacetylase. *Embo J*, 21, 2682-91.
- McKinsey, T.A., Zhang, C.L. and Olson, E.N. (2001) Control of muscle development by dueling HATs and HDACs. *Curr Opin Genet Dev*, 11, 497-504.
- Pflum, M.K., Tong, J.K., Lane, W.S. and Schreiber, S.L. (2001) Histone deacetylase 1 phosphorylation promotes enzymatic activity and complex formation. *J Biol Chem*, 276, 47733-41.
- Sun, J.M., Chen, H.Y., Moniwa, M., Litchfield, D.W., Seto, E. and Davie, J.R. (2002) The transcriptional repressor Sp3 is associated with CK2-phosphorylated histone deacetylase 2. *J Biol Chem*, 277, 35783-6.
- Tsai, S.C. and Seto, E. (2002) Regulation of histone deacetylase 2 by protein kinase CK2. *J Biol Chem*, 277, 31826-33.
